# Supplementary material for: A Comprehensive Study on Folate-Targeted Mesoporous Silica Nanoparticles Loaded with 5-Fluorouracil for the Enhanced Treatment of Gynecological Cancers
Source: MDPI journal article supplement (doi:10.3390/jfb15030074), 2024-03-20
Supplement: s1 [file s1]

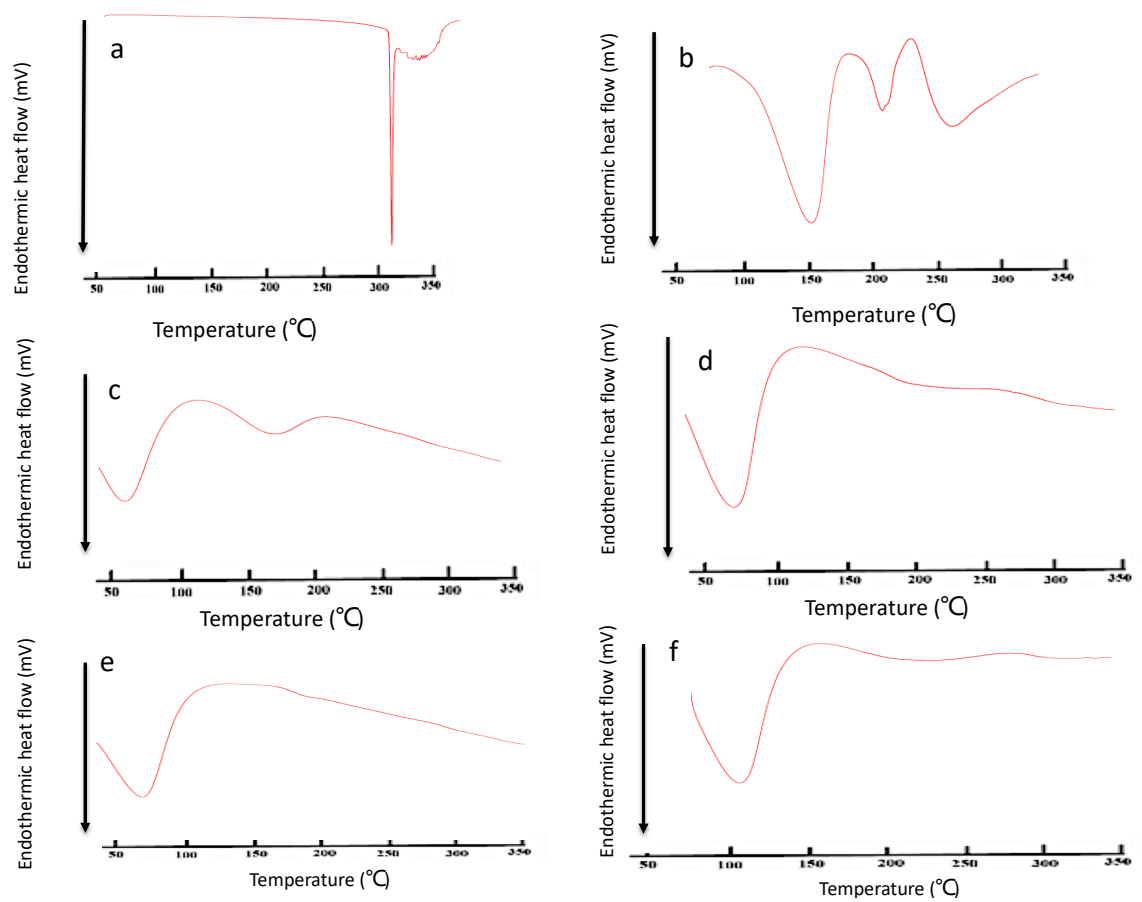

Figure S1: A) The DSC thermograms of (a) 5-FU (b) folic acid (c) MSN-NH<sub>2</sub> (d) MSN-NH<sub>2</sub>-FA (e) MSN-NH<sub>2</sub>-5FU and (f) MSN-NH<sub>2</sub>-5FU-FA B).

**Table S1.** Statistical significance in cell viability between different treatment groups in SKOV-3

Statistical significance was obtained with p-values  $\leq 0.05$ , where \*  $p \leq 0.05$ , \*\*  $p \leq 0.01$ , \*\*\*  $p \leq 0.001$ , and \*\*\*\*  $p < 0.0001$ .

|                                | 3.12µg/<br>ml | 6.25<br>µg/ml | 12.5<br>µg/ml | 25 µg/ml | 50 µg/ml | 100<br>µg/ml |
|--------------------------------|---------------|---------------|---------------|----------|----------|--------------|
| Folic acid vs. MSN-NH2-FA      | Ns            | *             | ****          | ****     | ****     | ****         |
| Folic acid vs. MSN-NH2         | ns            | ns            | ****          | **       | ****     | ****         |
| Folic acid vs. MSN-NH2-5-FU    | ns            | *             | ****          | ****     | ****     | ****         |
| Folic acid vs. MSN-NH2-5FU-FA  | *             | ****          | ****          | ****     | ****     | ****         |
| Folic acid vs. 5FU             | ns            | ***           | ****          | ****     | ****     | ****         |
| MSN-NH2-FA vs. MSN-NH2         | ns            | **            | ****          | ****     | ****     | ****         |
| MSN-NH2-FA vs. MSN-NH2-5FU     | ns            | ns            | ***           | ****     | ns       | ns           |
| MSN-NH2-FA vs. MSN-NH2-5FU-FA  | ns            | ****          | ****          | ****     | ****     | ****         |
| MSN-NH2-FA vs. 5FU             | ns            | *             | ns            | ****     | ****     | ****         |
| MSN-NH2 vs. MSN-NH2-5FU        | ns            | ***           | ****          | ****     | ****     | ****         |
| MSN-NH2 vs. . MSN-NH2-5FU-FA   | ns            | ****          | ****          | ****     | ****     | ****         |
| MSN-NH2 vs. 5FU                | ns            | ****          | ****          | ****     | ****     | ****         |
| MSN-NH2-5FU vs. MSN-NH2-5FU-FA | ns            | ****          | ****          | ****     | ****     | ****         |
| MSN-NH2-5FU vs. 5FU            | ns            | ns            | **            | ns       | ****     | ****         |
| MSN-NH2-5FU-FA vs. 5FU         | ns            | ***           | ****          | ****     | ****     | ****         |

**Table S2.** Statistical significance in cell viability between different treatment groups in HeLa cells.

|                                | 3.125µg/<br>ml | 6.25<br>µg/ml | 12.5<br>µg/ml | 25 µg/ml | 50 µg/ml | 100 µg/m |
|--------------------------------|----------------|---------------|---------------|----------|----------|----------|
| Folic acid vs. MSN-NH2-FA      | ns             | ns            | ****          | ****     | ****     | **       |
| Folic acid vs. MSN-NH2         | ns             | ns            | ns            | ****     | ****     | **       |
| Folic acid vs. MSN-NH2-5-FU    | ns             | ns            | ns            | ***      | ****     | ns       |
| Folic acid vs. MSN-NH2-5FU-FA  | ns             | *             | ***           | ****     | ****     | ***      |
| Folic acid vs. 5FU             | *              | ns            | ***           | ****     | ****     | *        |
| MSN-NH2-FA vs. MSN-NH2         | ns             | ns            | ***           | ****     | ****     | ****     |
| MSN-NH2-FA vs. MSN-NH2-5-FU    | ns             | ns            | ****          | *        | ****     | ns       |
| MSN-NH2-FA vs. MSN-NH2-5FU-FA  | ns             | ns            | ns            | *        | *        | ns       |
| MSN-NH2-FA vs. 5FU             | ns             | ns            | ns            | ns       | **       | ns       |
| MSN-NH2 vs. MSN-NH2-5-FU       | ns             | ns            | ns            | ****     | ****     | ****     |
| MSN-NH2 vs. . MSN-NH2-5FU-FA   | ns             | *             | ***           | ****     | ****     | ****     |
| MSN-NH2 vs. 5FU                | ns             | ns            | ***           | ****     | ****     | ****     |
| MSN-NH2-5FU vs. MSN-NH2-5FU-FA | *              | **            | ****          | ****     | ****     | *        |
| MSN-NH2-5FU vs. 5FU            | **             | ns            | ***           | ns       | ****     | ns       |
| MSN-NH2-5FU-FA vs. 5FU         | ns             | ns            | ns            | ***      | ns       | ns       |

Statistical significance was obtained with p-values  $\leq 0.05$ , where \*  $p \leq 0.05$ , \*\*  $p \leq 0.01$ , \*\*\*  $p \leq 0.001$ , and \*\*\*\*  $p < 0.0001$ .

**Table S3.** Statistical significance in cell viability between different treatment groups in Ca-Ski cells.

|                                | 3.125µg/<br>ml | 6.25<br>µg/ml | 12.5<br>µg/ml | 25 µg/ml | 50 µg/ml | 100 µg/m |
|--------------------------------|----------------|---------------|---------------|----------|----------|----------|
| Folic acid vs. MSN-NH2-FA      | *              | *             | ****          | ****     | ****     | ****     |
| Folic acid vs. MSN-NH2         | ****           | ****          | *             | ****     | ****     | ****     |
| Folic acid vs. MSN-NH2-5-FU    | ***            | ****          | ****          | **       | ****     | ****     |
| Folic acid vs. MSN-NH2-5FU-FA  | ns             | ****          | ****          | ****     | ****     | ****     |
| Folic acid vs. 5FU             | ns             | ****          | ****          | ****     | ***      | ***      |
| MSN-NH2-FA vs. MSN-NH2         | ***            | *             | ****          | ****     | ****     | ****     |
| MSN-NH2-FA vs. MSN-NH2-5-FU    | ns             | ****          | ns            | ****     | ****     | ****     |
| MSN-NH2-FA vs. MSN-NH2-5FU-FA  | ns             | ****          | ****          | ****     | ****     | ****     |
| MSN-NH2-FA vs. 5FU             | ns             | ***           | *             | ***      | ****     | ****     |
| MSN-NH2 vs. MSN-NH2-5-FU       | **             | ***           | ****          | ****     | ****     | ****     |
| MSN-NH2 vs. . MSN-NH2-5FU-FA   | ****           | ****          | ****          | ****     | ****     | ****     |
| MSN-NH2 vs. 5FU                | ****           | ns            | ****          | **       | ****     | ****     |
| MSN-NH2-5FU vs. MSN-NH2-5FU-FA | ns             | ****          | ****          | ****     | ****     | ****     |
| MSN-NH2-5FU vs. 5FU            | **             | *             | *             | ****     | ****     | ****     |
| MSN-NH2-5FU-FA vs. 5FU         | ns             | ****          | ****          | ****     | ****     | ****     |

Statistical significance was obtained with p-values  $\leq 0.05$ , where \*  $p \leq 0.05$ , \*\*  $p \leq 0.01$ , \*\*\*  $p \leq 0.001$ , and \*\*\*\*  $p < 0.0001$ .

**Table S4.** Statistical significance in cell viability between different treatment groups in C-33 A cells.

|                                | 3.125µg/<br>ml | 6.25<br>µg/ml | 12.5<br>µg/ml | 25 µg/ml | 50 µg/ml | 100 µg/m |
|--------------------------------|----------------|---------------|---------------|----------|----------|----------|
| Folic acid vs. MSN-NH2-FA      | ns             | ****          | ****          | ****     | ****     | ****     |
| Folic acid vs. MSN-NH2         | ns             | ns            | **            | ***      | ns       | ****     |
| Folic acid vs. MSN-NH2-5-FU    | ns             | ****          | ****          | ****     | ****     | ****     |
| Folic acid vs. MSN-NH2-5FU-FA  | ns             | ****          | ****          | ****     | ****     | ****     |
| Folic acid vs. 5FU             | ns             | ***           | ns            | ****     | *        | ***      |
| MSN-NH2-FA vs. MSN-NH2         | ns             | ****          | ****          | ****     | ****     | ****     |
| MSN-NH2-FA vs. MSN-NH2-5-FU    | ns             | ****          | **            | ***      | ns       | ****     |
| MSN-NH2-FA vs. MSN-NH2-5FU-FA  | ns             | ***           | ****          | ****     | *        | ****     |
| MSN-NH2-FA vs. 5FU             | ns             | ****          | ****          | ****     | ***      | ****     |
| MSN-NH2 vs. MSN-NH2-5-FU       | ns             | ****          | ****          | ****     | ****     | ****     |
| MSN-NH2 vs. MSN-NH2-5FU-FA     | ns             | ****          | ****          | ****     | ****     | ****     |
| MSN-NH2 vs. 5FU                | ns             | ns            | ***           | ****     | ***      | ****     |
| MSN-NH2-5FU vs. MSN-NH2-5FU-FA | ns             | ns            | ***           | ****     | ns       | ****     |
| MSN-NH2-5FU vs. 5FU            | ns             | ****          | ****          | ****     | ****     | ****     |
| MSN-NH2-5FU-FA vs. 5FU         | ns             | ****          | ****          | ****     | ****     | ****     |

Statistical significance was obtained with p-values  $\leq 0.05$ , where \*  $p \leq 0.05$ , \*\*  $p \leq 0.01$ , \*\*\*  $p \leq 0.001$ , and \*\*\*\*  $p < 0.0001$ .

**Table S5.** Statistical significance of Intracellular uptake of 5-FU using HPLC between different treatment groups in SKOV-3 cells

|                                | 0.5 h | 1 h  | 2 h  | 4 h | 8 h |
|--------------------------------|-------|------|------|-----|-----|
| MSN-NH2-5FU vs. 5FU            | ***   | ns   | ns   | ns  | ns  |
| MSN-NH2-5FU-FA vs. 5FU         | ****  | **** | **** | ns  | ns  |
| MSN-NH2-5FU vs. MSN-NH2-5FU-FA | ***   | **** | **** | ns  | ns  |

Statistical significance was obtained with p-values  $\leq 0.05$ , where \*  $p \leq 0.05$ , \*\*  $p \leq 0.01$ , \*\*\*  $p \leq 0.001$ , and \*\*\*\*  $p < 0.0001$ .

**Table S6.** Statistical significance of Intracellular uptake of 5-FU using HPLC between different treatment groups in HeLa cells

|                                | 0.5 h | 1 h  | 2 h  | 4 h | 8 h  |
|--------------------------------|-------|------|------|-----|------|
| MSN-NH2-5FU vs. 5FU            | ***   | **** | ns   | ns  | ns   |
| MSN-NH2-5FU-FA vs. 5FU         | ****  | **** | **** | ns  | **** |
| MSN-NH2-5FU vs. MSN-NH2-5FU-FA | ****  | **** | **** | ns  | **** |

Statistical significance was obtained with p-values  $\leq 0.05$ , where \*  $p \leq 0.05$ , \*\*  $p \leq 0.01$ , \*\*\*  $p \leq 0.001$ , and \*\*\*\*  $p < 0.0001$ .

**Table S7.** Statistical significance of Intracellular uptake of 5-FU using HPLC between different treatment groups in Ca-Ski cells

|                                | 0.5 h | 1 h  | 2 h  | 4 h  | 8 h  |
|--------------------------------|-------|------|------|------|------|
| MSN-NH2-5FU vs. 5FU            | ****  | ns   | **** | **** | **** |
| MSN-NH2-5FU-FA vs. 5FU         | ****  | **** | **** | **   | ns   |
| MSN-NH2-5FU vs. MSN-NH2-5FU-FA | ****  | **** | **** | **** | **** |

Statistical significance was obtained with p-values  $\leq 0.05$ , where \*  $p \leq 0.05$ , \*\*  $p \leq 0.01$ , \*\*\*  $p \leq 0.001$ , and \*\*\*\*  $p < 0.0001$ .

**Table S8.** Statistical significance of Intracellular uptake of 5-FU using HPLC between different treatment groups in C-33 A cells

|                                | 0.5 h | 1 h  | 2 h  | 4 h  | 8 h |
|--------------------------------|-------|------|------|------|-----|
| MSN-NH2-5FU vs. 5FU            | *     | ns   | ***  | **** | *** |
| MSN-NH2-5FU-FA vs. 5FU         | ****  | **** | **** | **** | *** |
| MSN-NH2-5FU vs. MSN-NH2-5FU-FA | ****  | **** | **** | **** | ns  |

Statistical significance was obtained with p-values  $\leq 0.05$ , where \*  $p \leq 0.05$ , \*\*  $p \leq 0.01$ , \*\*\*  $p \leq 0.001$ , and \*\*\*\*  $p < 0.0001$ .

**Table S9.** Statistical significance of Intracellular uptake of 5-FU using ICP-MS between different treatment groups in SKOV-3

|                                                          | 0.5 h | 1 h  | 2 h | 4 h  | 8 h |
|----------------------------------------------------------|-------|------|-----|------|-----|
| MSN-NH <sub>2</sub> -5FU vs. MSN-NH <sub>2</sub> -5FU-FA | ****  | **** | *** | **** | ns  |
| 5FU PBS vs. MSN-NH <sub>2</sub> -5-FU                    | ns    | ns   | ns  | ns   | ns  |
| 5FU PBS vs. MSN-NH <sub>2</sub> -5FU-FA                  | ****  | **** | *** | **** | ns  |

Statistical significance was obtained with p-values  $\leq 0.05$ , where \*  $p \leq 0.05$ , \*\*  $p \leq 0.01$ , \*\*\*  $p \leq 0.001$ , and \*\*\*\*  $p < 0.0001$ .

**Table S10.** Statistical significance of Intracellular uptake using ICP-MS between different treatment groups in HeLa

|                                                          | 0.5 h | 1 h  | 2 h  | 4 h  | 8 h |
|----------------------------------------------------------|-------|------|------|------|-----|
| MSN-NH <sub>2</sub> -5FU vs. MSN-NH <sub>2</sub> -5FU-FA | ****  | **** | **** | **   | *   |
| 5FU PBS vs. MSN-NH <sub>2</sub> -5-FU                    | ****  | **** | **** | **** | *** |
| 5FU PBS vs. MSN-NH <sub>2</sub> -5FU-FA                  | ****  | **** | **** | **   | **  |

Statistical significance was obtained with p-values  $\leq 0.05$ , where \*  $p \leq 0.05$ , \*\*  $p \leq 0.01$ , \*\*\*  $p \leq 0.001$ , and \*\*\*\*  $p < 0.0001$ .

**Table S11.** Statistical significance of Intracellular uptake using ICP-MS between different treatment groups in Ca-Ski

|                                                          | 0.5 h | 1 h  | 2 h  | 4 h  | 8 h |
|----------------------------------------------------------|-------|------|------|------|-----|
| MSN-NH <sub>2</sub> -5FU vs. MSN-NH <sub>2</sub> -5FU-FA | ****  | **** | **** | **** | **  |
| 5FU PBS vs. MSN-NH <sub>2</sub> -5-FU                    | ****  | **   | ns   | **   | ns  |
| 5FU PBS vs. MSN-NH <sub>2</sub> -5FU-FA                  | ****  | **** | **** | **** | *** |

Statistical significance was obtained with p-values  $\leq 0.05$ , where \*  $p \leq 0.05$ , \*\*  $p \leq 0.01$ , \*\*\*  $p \leq 0.001$ , and \*\*\*\*  $p < 0.0001$ .

**Table S12.** Statistical significance of Intracellular uptake using ICP-MS between different treatment groups in C-33 A

|                                                          | 0.5 h | 1 h  | 2 h  | 4 h  | 8 h |
|----------------------------------------------------------|-------|------|------|------|-----|
| MSN-NH <sub>2</sub> -5FU vs. MSN-NH <sub>2</sub> -5FU-FA | ****  | **** | **** | **** | **  |
| MSN-NH <sub>2</sub> -5FU vs. 5FU PBS                     | ****  | **   | ns   | **   | ns  |
| MSN-NH <sub>2</sub> -5FU-FA vs. 5FU PBS                  | ****  | **** | **** | **** | *** |

Statistical significance was obtained with p-values  $\leq 0.05$ , where \*  $p \leq 0.05$ , \*\*  $p \leq 0.01$ , \*\*\*  $p \leq 0.001$ , and \*\*\*\*  $p < 0.0001$ .
